# Supplementary material for: Characteristics of undergraduate, second speciality and sub-speciality mental health programmes in Peru: a scoping review
Source: Research Square preprint supplement (doi:10.21203/rs.3.rs-1303396/v1), 2022-02-15
Supplement: Supplementary file 1 [file d2c02502af8f76bdb8c1fcc4.docx]

**Supplement**

Supplement 1. Mental health staff required and identified at Community Mental Health Centres during 2019.

| Services | Requested staff | % Identified staff | |
| --- | --- | --- | --- |
| Identified staff with the career requirement | Identified staff with the specialty requirement |
| Services for the prevention and control of childhood and adolescent problems and disorders | Psychiatrist with training and/or experience in child psychiatry | 80.6% | 67.5% |
| Psychologist with studies or experience in child, adolescent, and cognitive-behavioural psychotherapy and/or family therapy. | 98.1% | 93.1% |
| Nurse with experience or studies in mental health and/or public health. | 99.0% | 99.0% |
| Medical technologist specializing in speech therapy, or health professional with specialization in speech therapy. | 57.3% | - |
| Medical technologist specializing in occupational therapy | 31.1% |
| Social worker | 74.8% | - |
| Services for the prevention and control of problems and disorders of adults and the elderly | Psychiatrist or surgeon with studies and/or experience in family and community medicine. | 71.8% | 85.1% |
| Clinical psychologist with psychotherapeutic training | 86.4% | 84.3% |
| Nurse with experience or studies in mental health and/or public health. | 96.1% | 88.9% |
| Addiction prevention and control service | Psychiatrist with experience or studies in the field of addictions. | 72.8% | 86.7% |
|  | Clinical psychologist with psychotherapeutic training | 88.3% | 91.2% |
| Social and community participation service | Surgeon with a background in family and community medicine and/or mental health | 68.0% | 87.1% |
| Sociologist* | 2.9% | - |
| Anthropologist* | 2.9% | - |
| Social Worker* | 65.0% | - |

*Source:* Supervision of Community Mental Health Centres. Ombudsman's Office in 2019. *Note*: *According to the technical standard for CSMC the social and community participation service does not need to have a sociologist, anthropologist and social worker at the same time, but some of them. The social or community psychologist is another option.
